# Supplementary material
Source: MDPI journal article supplement (https://www.mdpi.com/2076-3417/13/16/9469)
Supplement: s1 [file s1]

## Supplementary Material

**Table S1.** Pre-defined regions and the respective electrodes in the HD-EEG.

| Brain area                   | colour | Electrode Numbers                           |                                      |
|------------------------------|--------|---------------------------------------------|--------------------------------------|
|                              |        | right                                       | left                                 |
| Primary motor cortex         | Pink   | 195, 196, 197, 198, 207, 206, 205           | 24, 17, 50, 51, 42, 43, 58           |
| Primary somatosensory cortex | green  | 182, 183, 184, 185, 186                     | 9, 44, 52, 59, 65                    |
| Premotor cortex              | yellow | 212, 213, 214, 215, 223, 224                | 30, 36, 40, 41, 49, 56               |
| Supplementary motor area     | blue   | 5, 6, 7, 14                                 | 16, 22, 23, 29                       |
| Posterior parietal cortex    | purple | 128, 129, 130, 141, 142, 152, 153, 161, 162 | 86, 87, 88, 89, 97, 98, 99, 100, 110 |

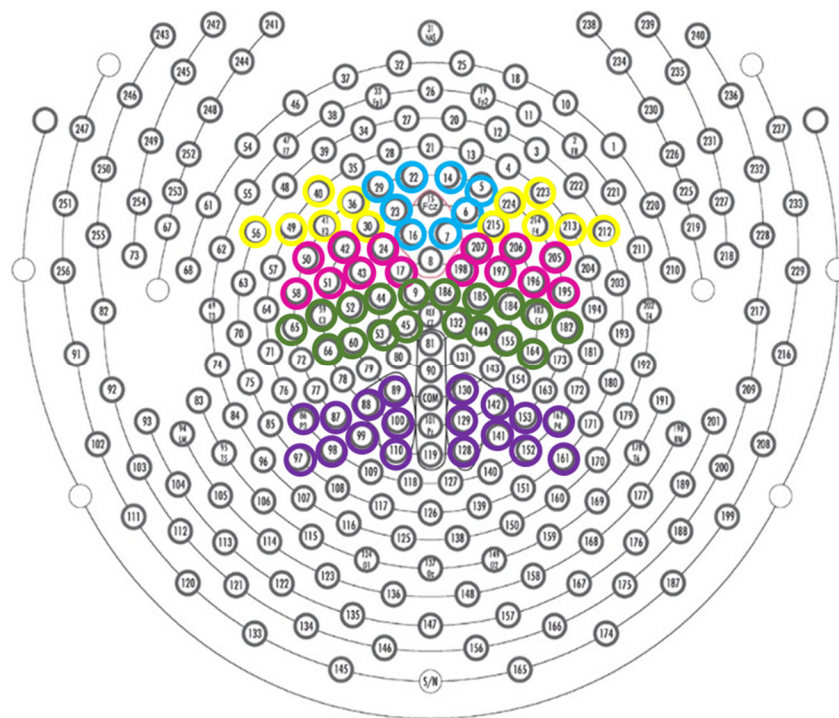

**Figure S1.** Pre-defined regions and the respective electrodes in the HD-EEG.

**Table S2.** Individual averaged model order of healthy participants and patients with SCI.

| healthy participant | mean model order | patient with SCI | mean model order |
|---------------------|------------------|------------------|------------------|
| HP1                 | 43               | P1               | 22               |
| HP2                 | 66               | P2               | 64               |
| HP3                 | 27               | P3               | 67               |
| HP4                 | 29               | P4               | 37               |
| HP5                 | 30               | P5               | 26               |
| HP6                 | 47               | P6               | 29               |
| HP7                 | 15               | P7               | 47               |
| HP8                 | 38               | P8               | 41               |
| HP9                 | 49               | P9               | 45               |
| HP10                | 33               | P10              | 70               |
| HP11                | 40               | P11              | 34               |
| HP12                | 47               | P12              | 41               |
| HP13                | 27               | P13              | 32               |
| HP14                | 22               | P14              | 49               |
| HP15                | 55               | P15              | 37               |
| HP16                | 27               | P16              | 44               |
| HP17                | 85               | P17              | 39               |
| HP18                | 39               | P18              | 36               |
| HP19                | 43               | P19              | 50               |
| HP20                | 66               | P20              | 42               |
| HP21                | 28               | P21              | 60               |
| HP22                | 21               | P22              | 17               |
| HP23                | 54               | P23              | 72               |
| HP24                | 24               |                  |                  |
| HP25                | 44               |                  |                  |
| HP26                | 32               |                  |                  |
| HP27                | 29               |                  |                  |
| HP28                | 26               |                  |                  |
| HP29                | 37               |                  |                  |
| HP30                | 49               |                  |                  |

**Table S3.** EEG-studies on the effects of sports/ exercise /physical activity on brain activity in patients with SCI.

| Author               | Year | n Patients | Activity                                                                                                            | EEG analysis                              | Focus                                                          |
|----------------------|------|------------|---------------------------------------------------------------------------------------------------------------------|-------------------------------------------|----------------------------------------------------------------|
| De Mello et al. [41] | 1996 | 11         | <b>Leg movement</b> with hand cycloergometer (increments of 12.5 w every 2 minutes until exhaustion)                | polysomnography, REM phase identification | Sleep study on restless leg syndrome and periodic leg movement |
| De Mello et al. [42] | 1997 | 28         | <b>Leg movement</b> with hand cycloergometer (increments of 12.5 w every 2 minutes until exhaustion)                | K-complex                                 | Sleep study on periodic leg movement and myoclonus             |
| De Mello et al. [43] | 2002 | 13         | <b>Leg movement</b> with hand cycloergometer (increments of 12.5 w every 2 minutes until exhaustion)                | polysomnography, REM phase identification | Sleep study on periodic leg movement                           |
| Cremoux et al. [44]  | 2017 | 8          | <b>isometric muscle contraction:</b> (right elbow joint) 21 repetitions each lasting 6s at 20%, 50% and 70% of rMVC | Net Torque Signal Coherence               | Corticomuscular Coherence                                      |
| Sato et al. [45]     | 2017 | 11         | <b>Wheelchair propulsion:</b> on bicycle training rollers, maximum speed for 15 minutes                             | Peak Alpha Frequency                      | Difference Pre- and Post exercise                              |

REM= Rapid Eye Movement, rMVC= relative Maximum Voluntary Contractions.
